# Supplementary material for: Synthesis and characterization of hierarchical TiO2microspheres composed of nanorods: effect of reaction conditions on nanorod density
Source: Royal Society of Chemistry journal article supplement (doi:10.1039/c4ra04413d), 2014-08-04

## Electronic Supplementary Information

### **Synthesis and characterization of hierarchical TiO<sub>2</sub> microspheres composed of nanorods: effect of reaction conditions on nanorod density**

Hongfan Guo,<sup>a,†</sup> Xiao-Ying Lu,<sup>\*b,†</sup> Yansong Pei,<sup>a</sup> Hong Chua,<sup>b</sup> Bin Wang,<sup>\*c</sup> Kuikui Wang,<sup>a</sup>  
Yindong Yang<sup>a</sup> and Yunyi Liu<sup>\*a</sup>

<sup>a</sup> College of Chemical Engineering, Shenyang University of Chemical Technology, Shenyang 110142, PR China. Fax: +86 024 89383760; Tel: +86 024 89383118; E-mail: liuyunyia@163.com

<sup>b</sup> Faculty of Science and Technology, Technological and Higher Education Institute of Hong Kong, Hong Kong, China. Email: xylu@vtc.edu.hk Fax: +852-21761554; Tel: +852-21761453

<sup>c</sup> Green Energy, Sensing & Integration Group, Hong Kong Applied Science and Technology Research Institute Company Limited, Hong Kong. Email: bwang@astri.org Fax: +852-34062802; Tel: +852-34062561

**Fig. S1** (a) a typical nanorod as building unit in hierarchical  $\text{TiO}_2$  microspheres and (b) selected area electron diffraction (SAED) pattern (scale bar in Fig. S1b is 5  $1/\text{nm}$ ).

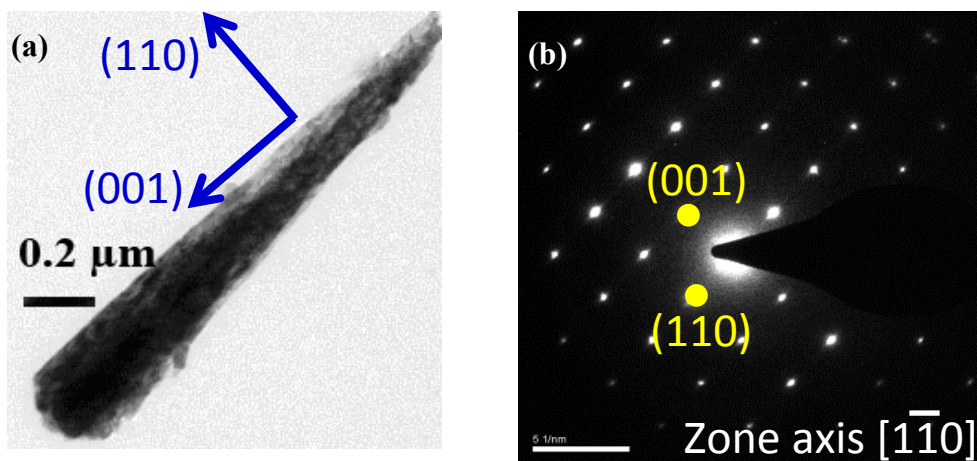

**Fig. S2** Relationship between TiO<sub>2</sub> rod density and rod diameter.

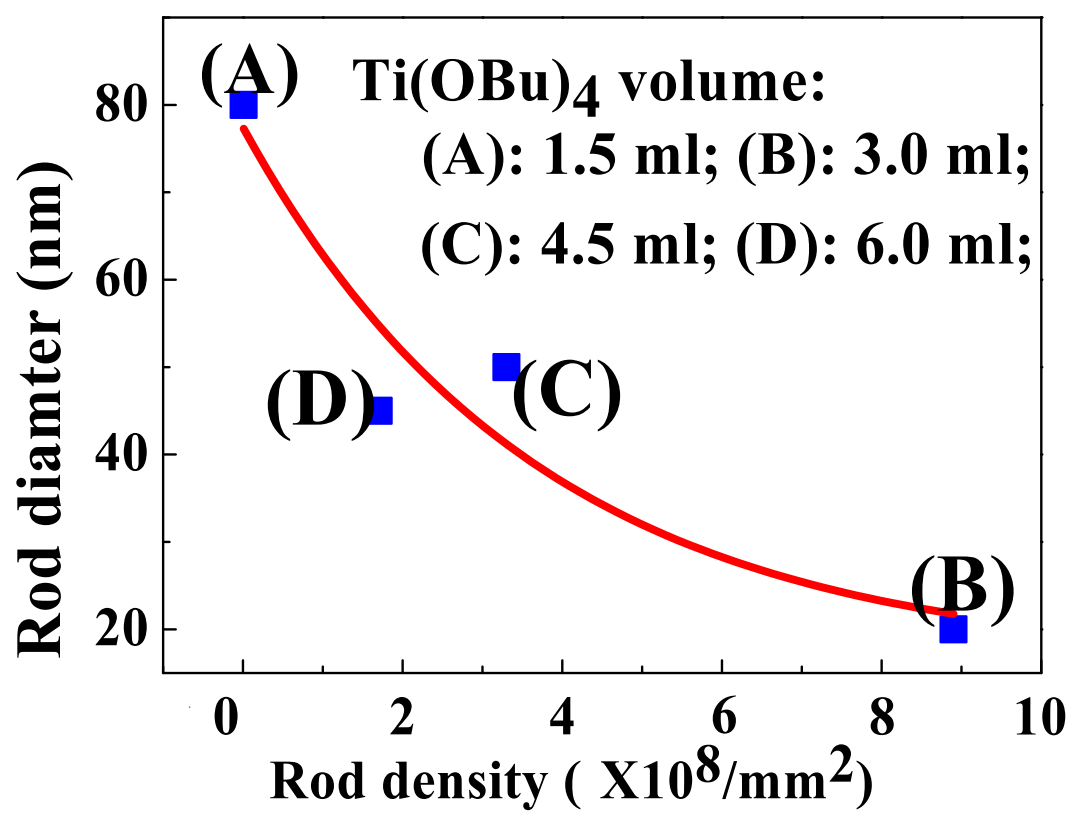

**Fig. S3** (a) TEM image of solid  $\text{TiO}_2$  microspheres prepared in the presence of  $\text{Na}_2\text{SO}_4$  as additives and (b) selected electron diffraction pattern.

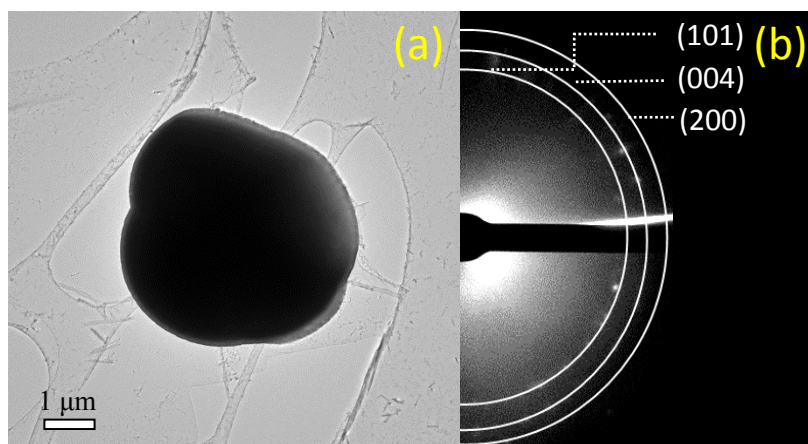

**Fig. S4** XRD pattern of solid TiO<sub>2</sub> microspheres prepared in the presence of Na<sub>2</sub>SO<sub>4</sub> as additives by hydrothermal method.

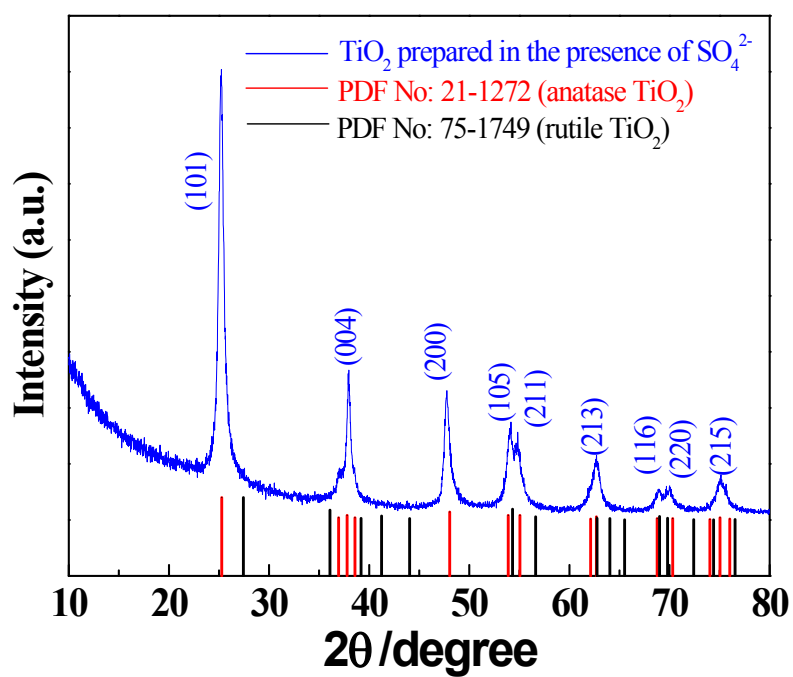

Supplement: c4ra04413d1.pdf [file c4ra04413d1.pdf]
